# Supplementary material for: A Review of Bioactive Compounds and Antioxidant Activity Properties of Piper Species
Source: MDPI journal article supplement (doi:10.3390/molecules27196774), 2022-10-10
Supplement: s1 [file s1]

## Supplementary Materials

### 2. Distribution, Botanical, Traditional Use and Pharmacological Properties of Five *Piper* Species

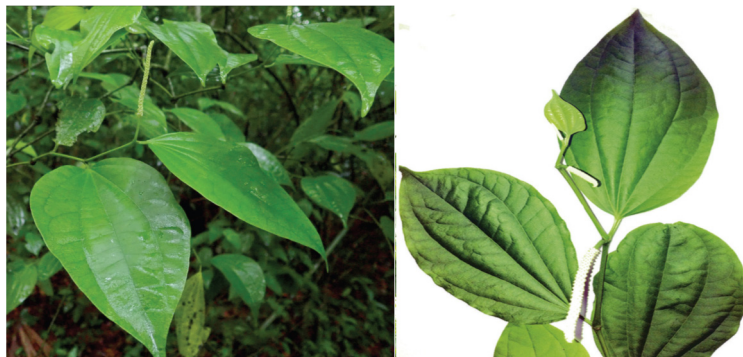

**Figure S1.** *P. amalago* leaves and plant

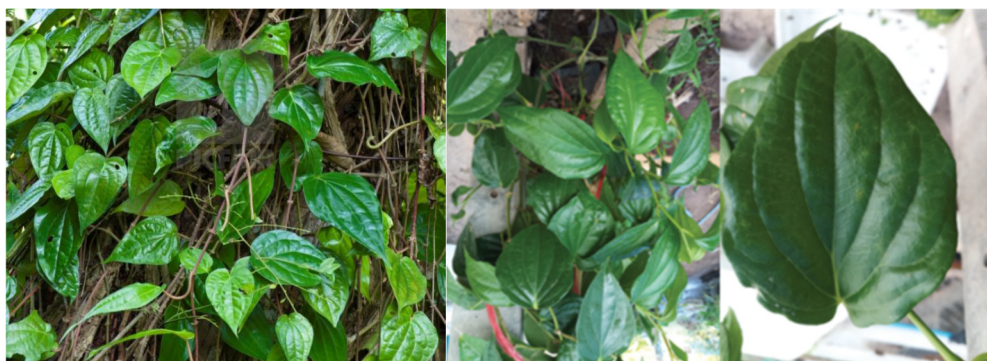

**Figure S2.** *P. betle* plant and leaves

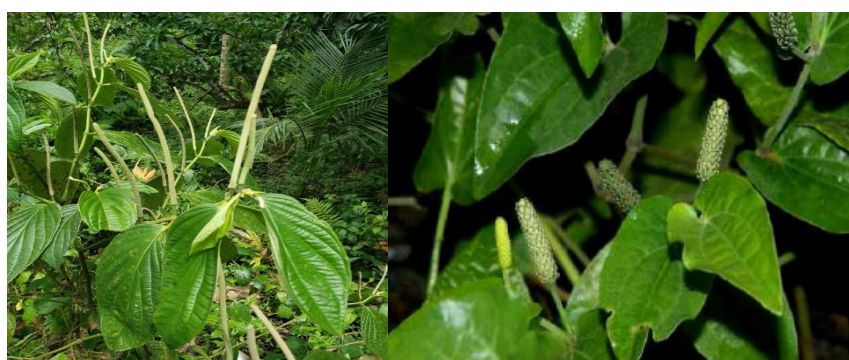

**Figure S3.** *P. hispidum* plant and leaves



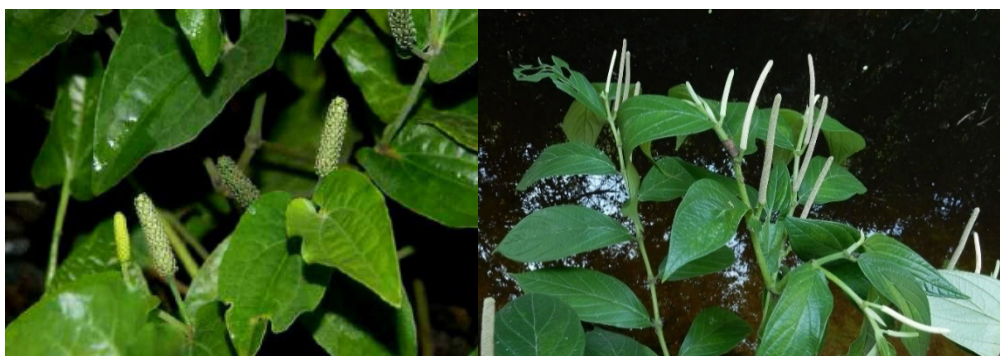

Figure S4. *P. longum* leaves and mature dried corns

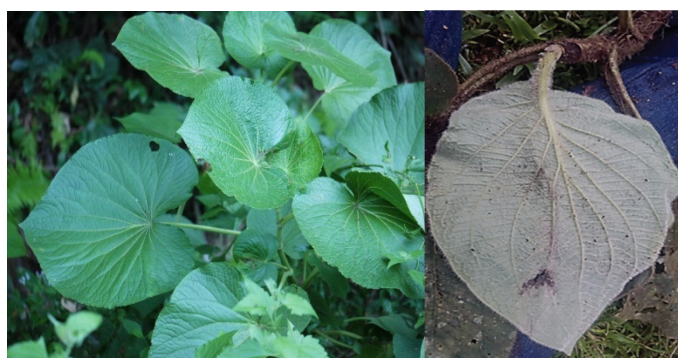

Figure S5. *P. umbellatum* plant and leaf

### 3. Chemical Composition of Five *Piper* Species

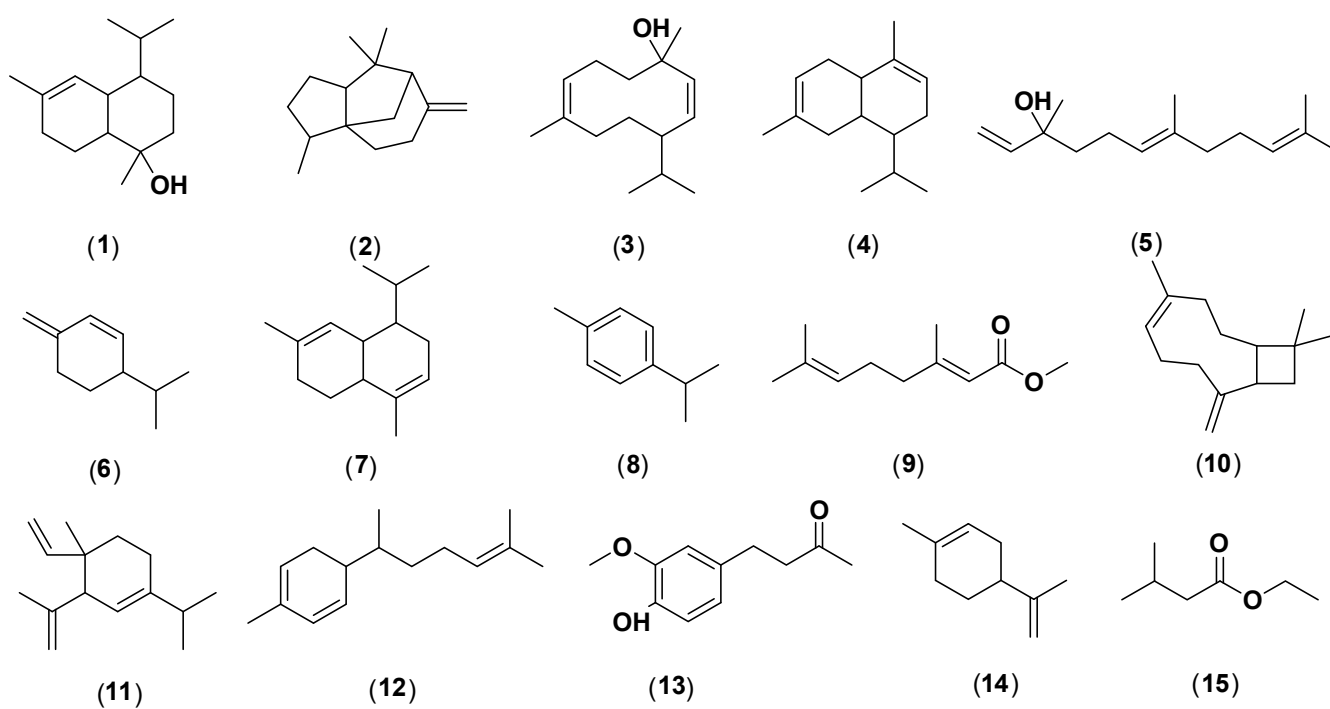

Figure S6. Cont.



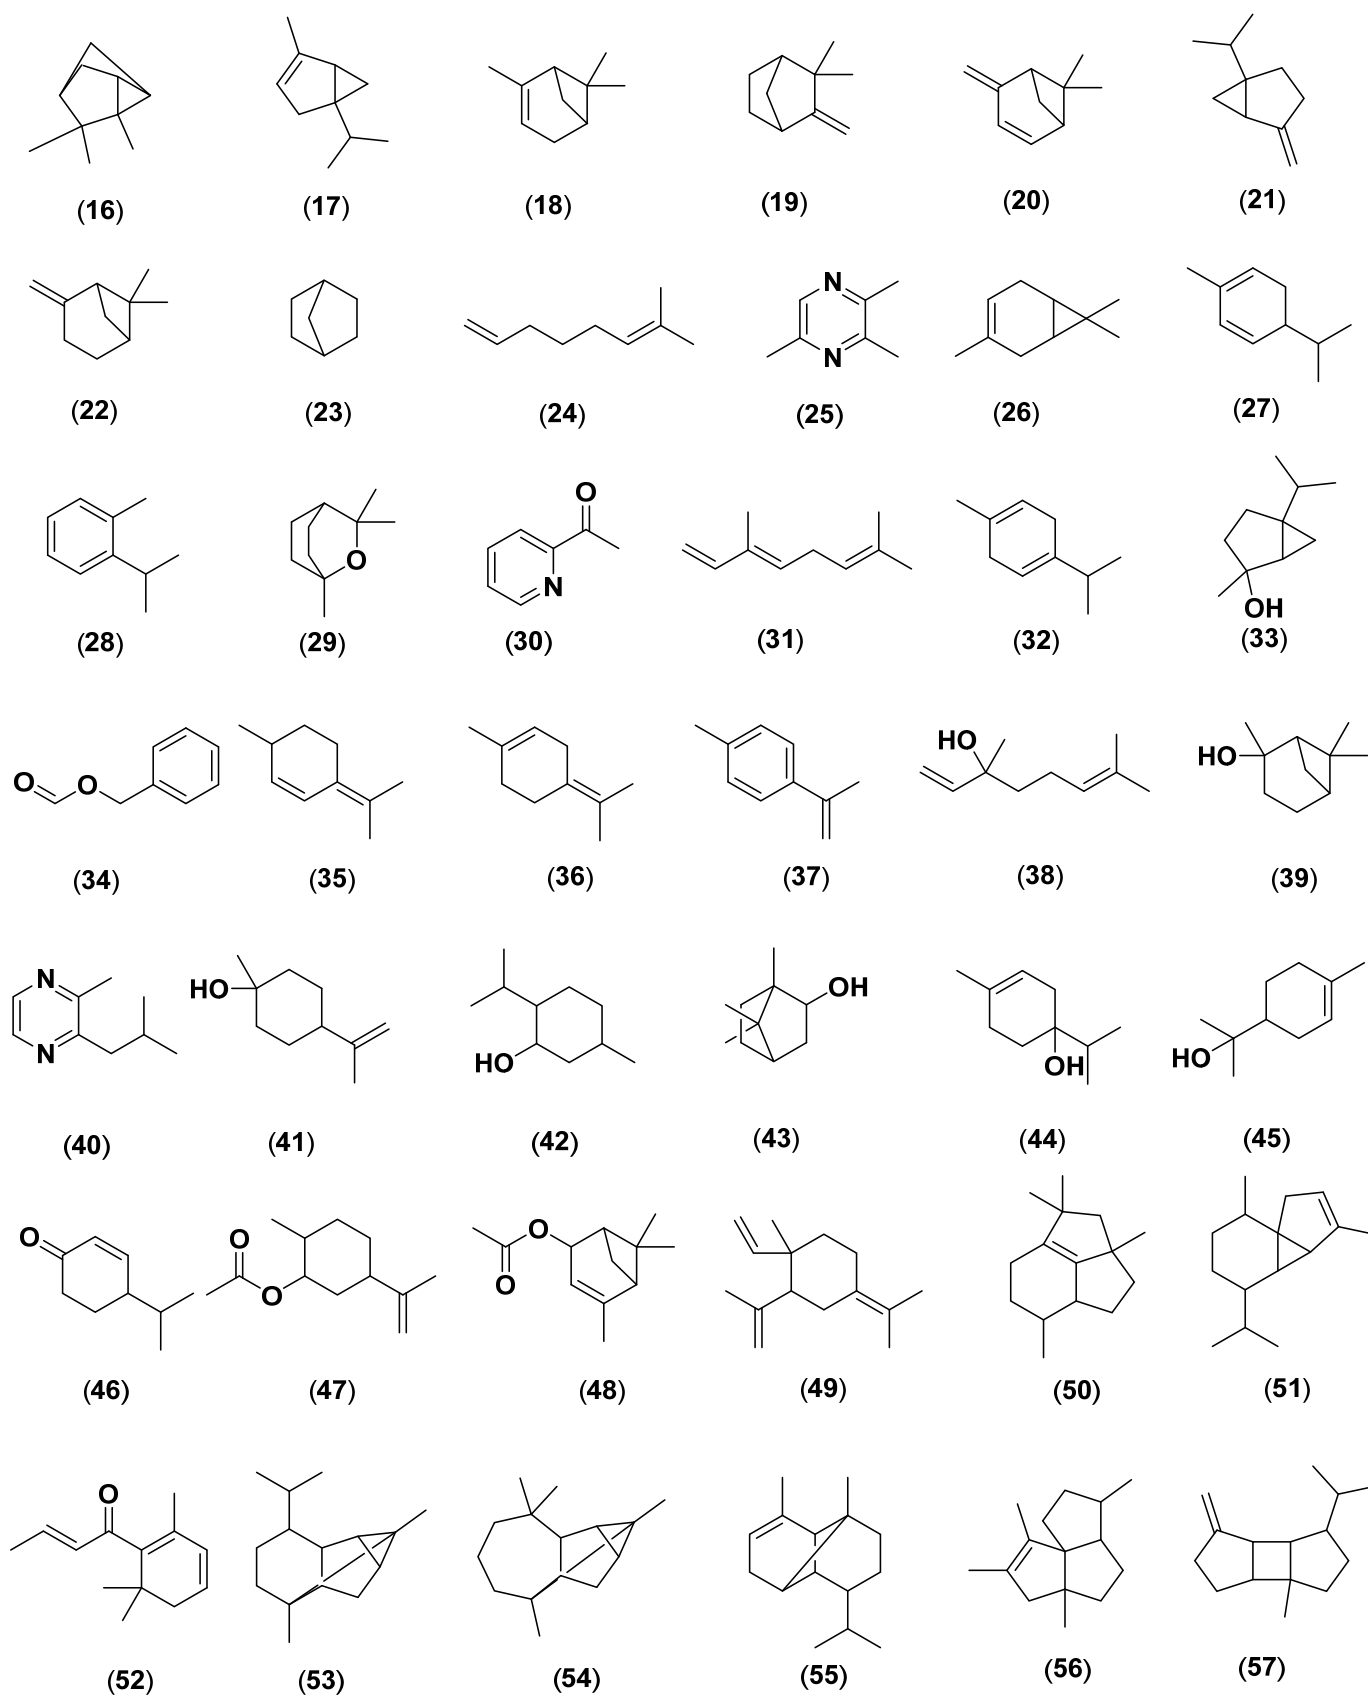

**Figure S6. Cont.**



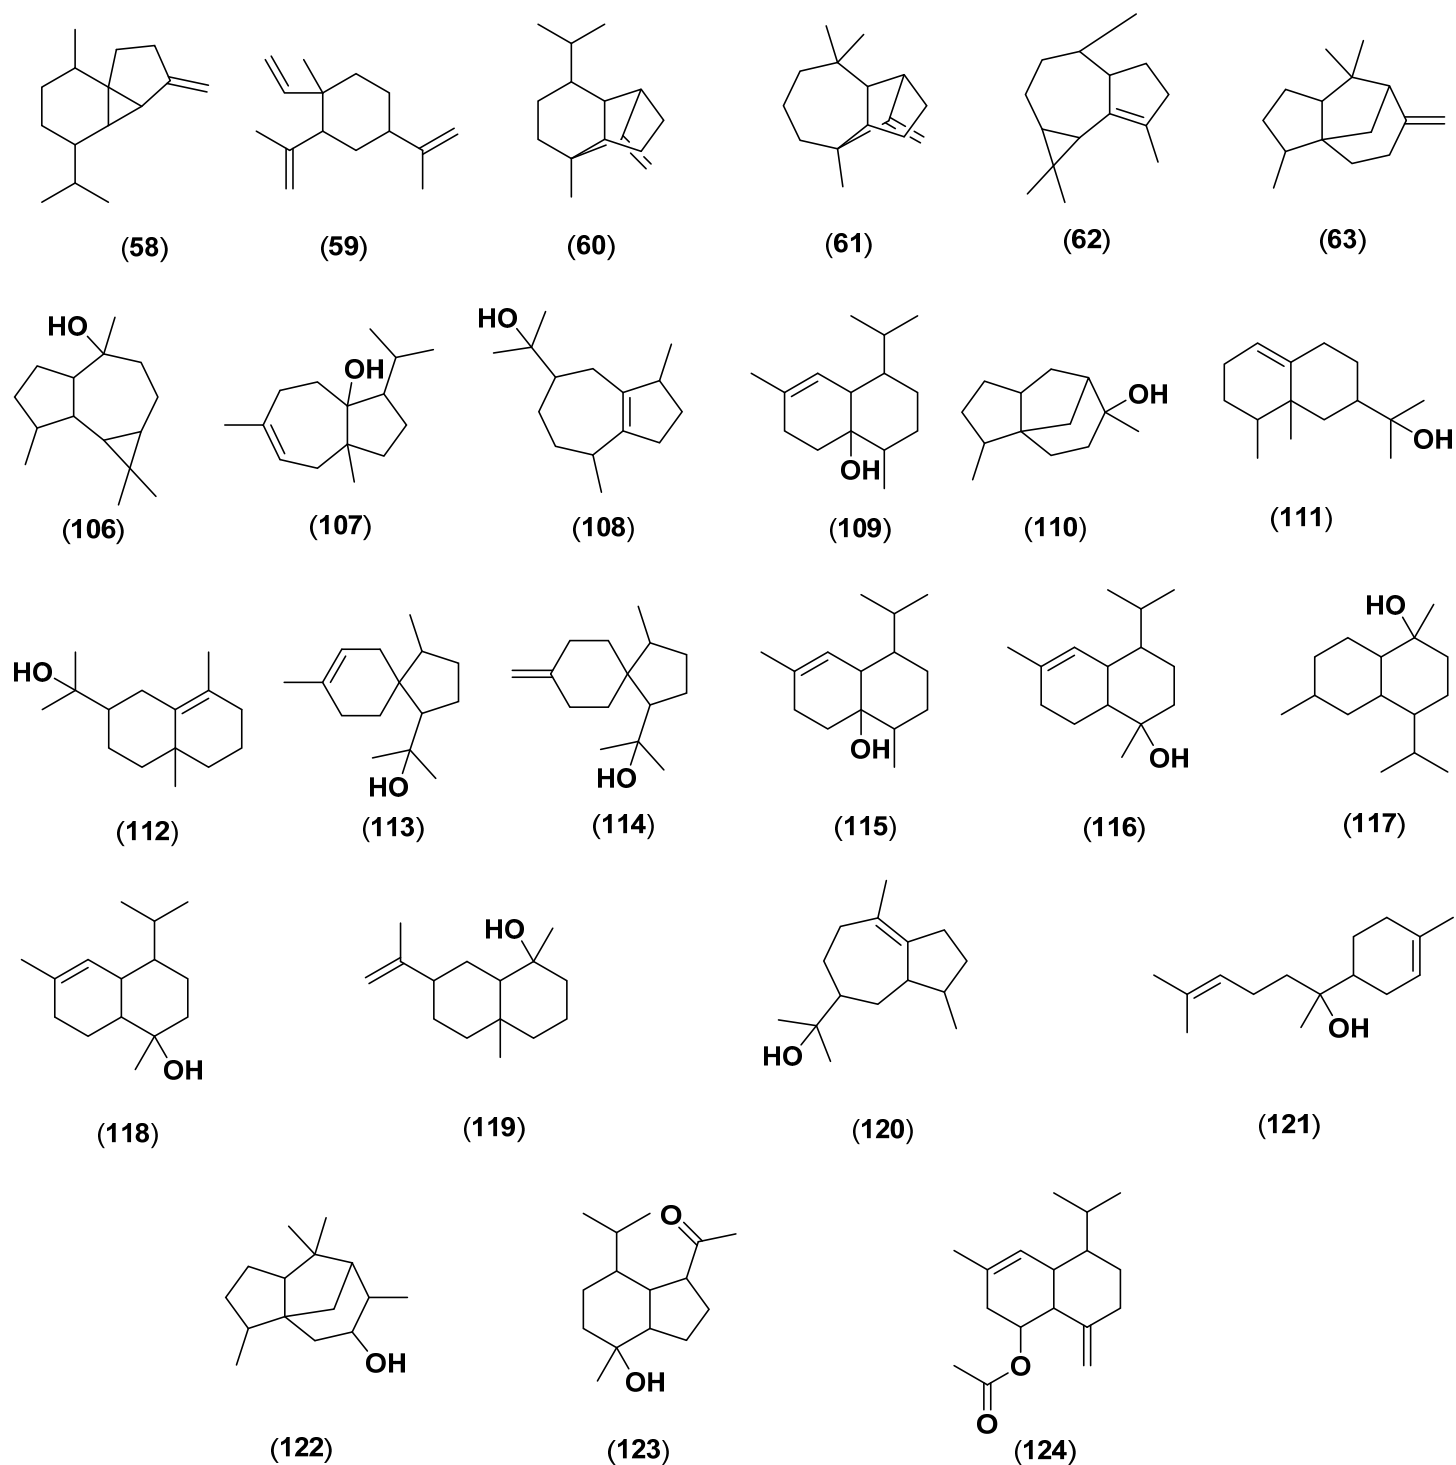

Figure S6. The structure chemical compound of *P. amalago*



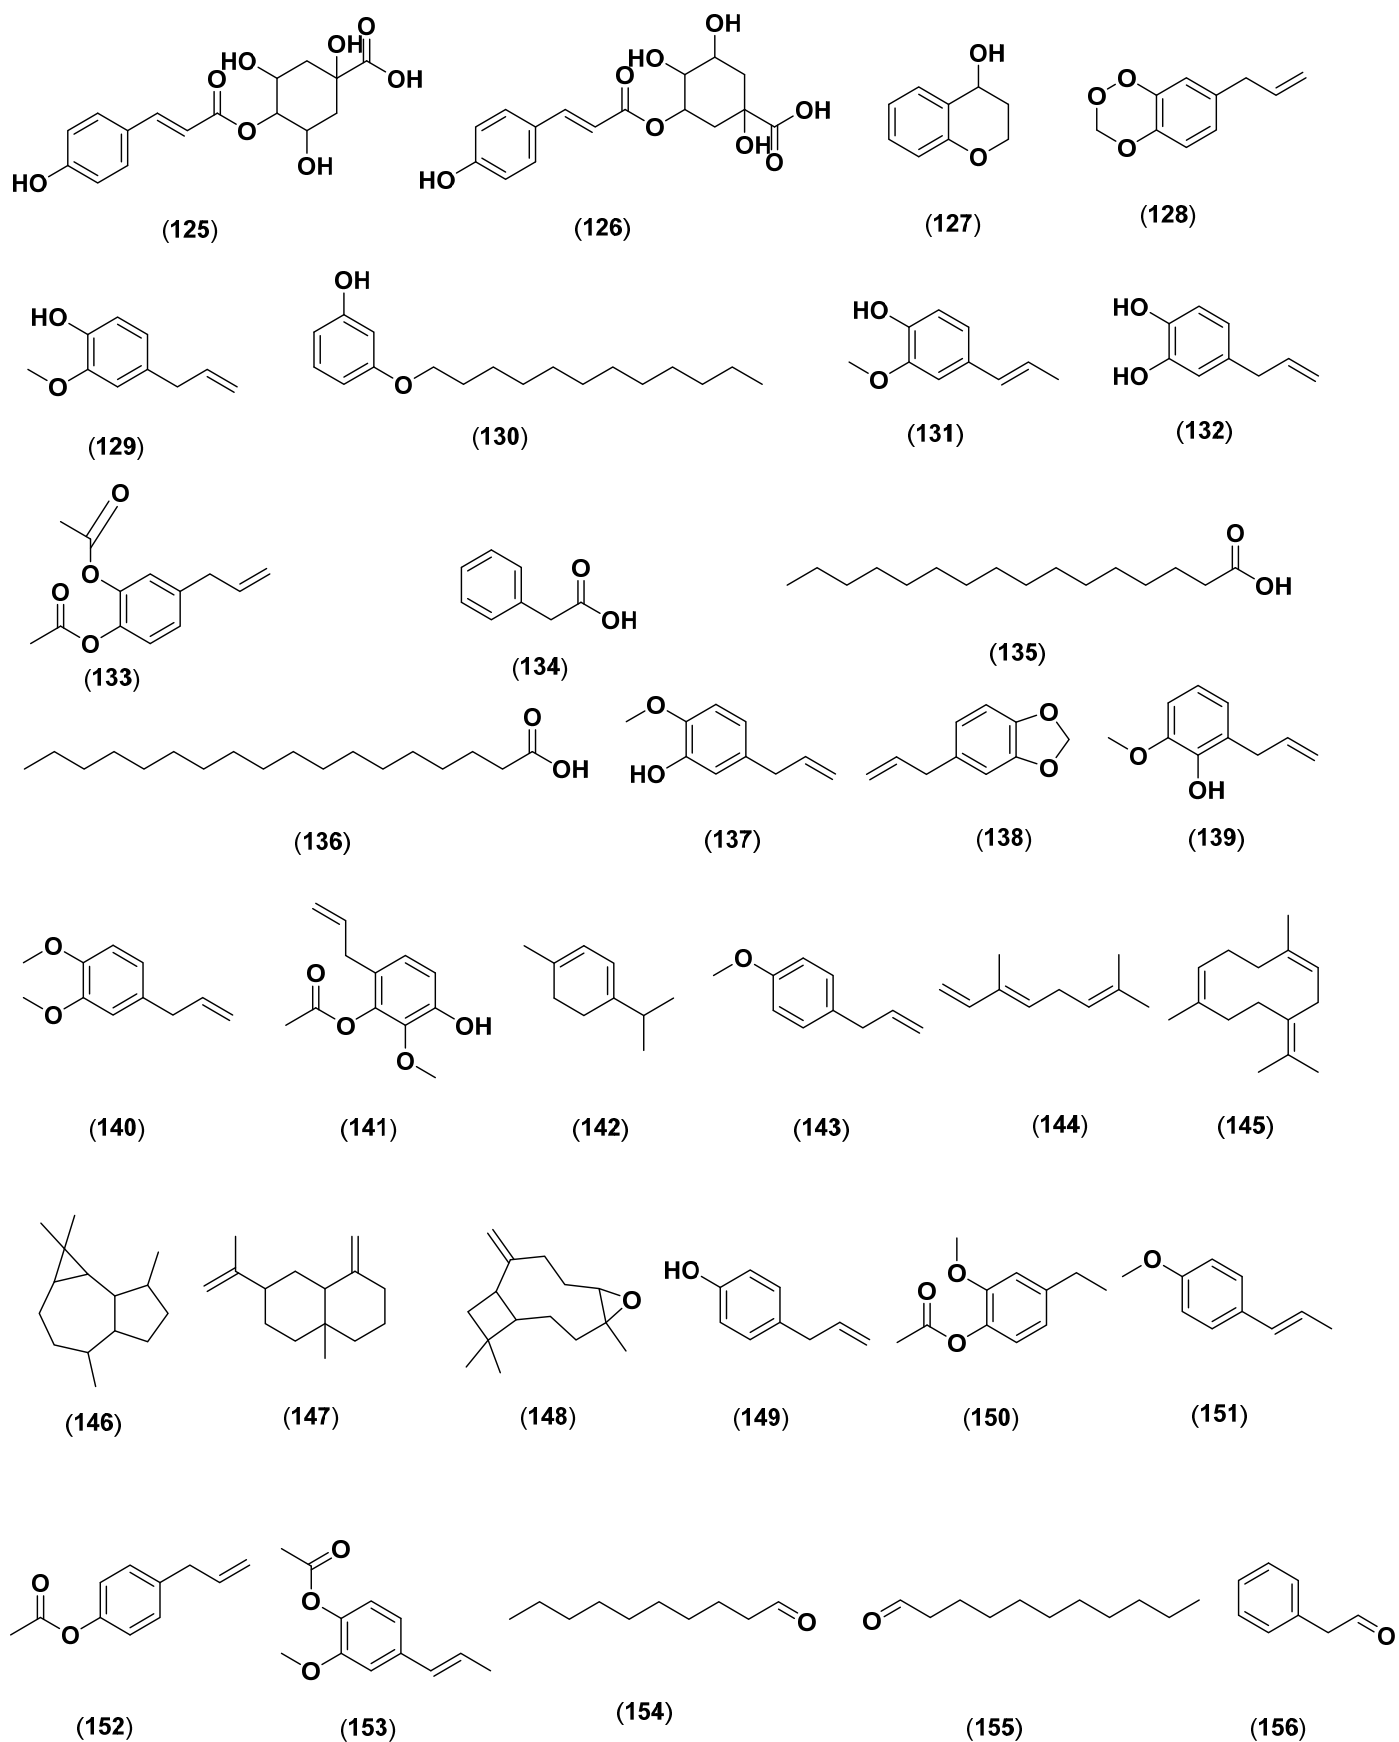

Figure S7. The structure chemical compound of *P. betle*



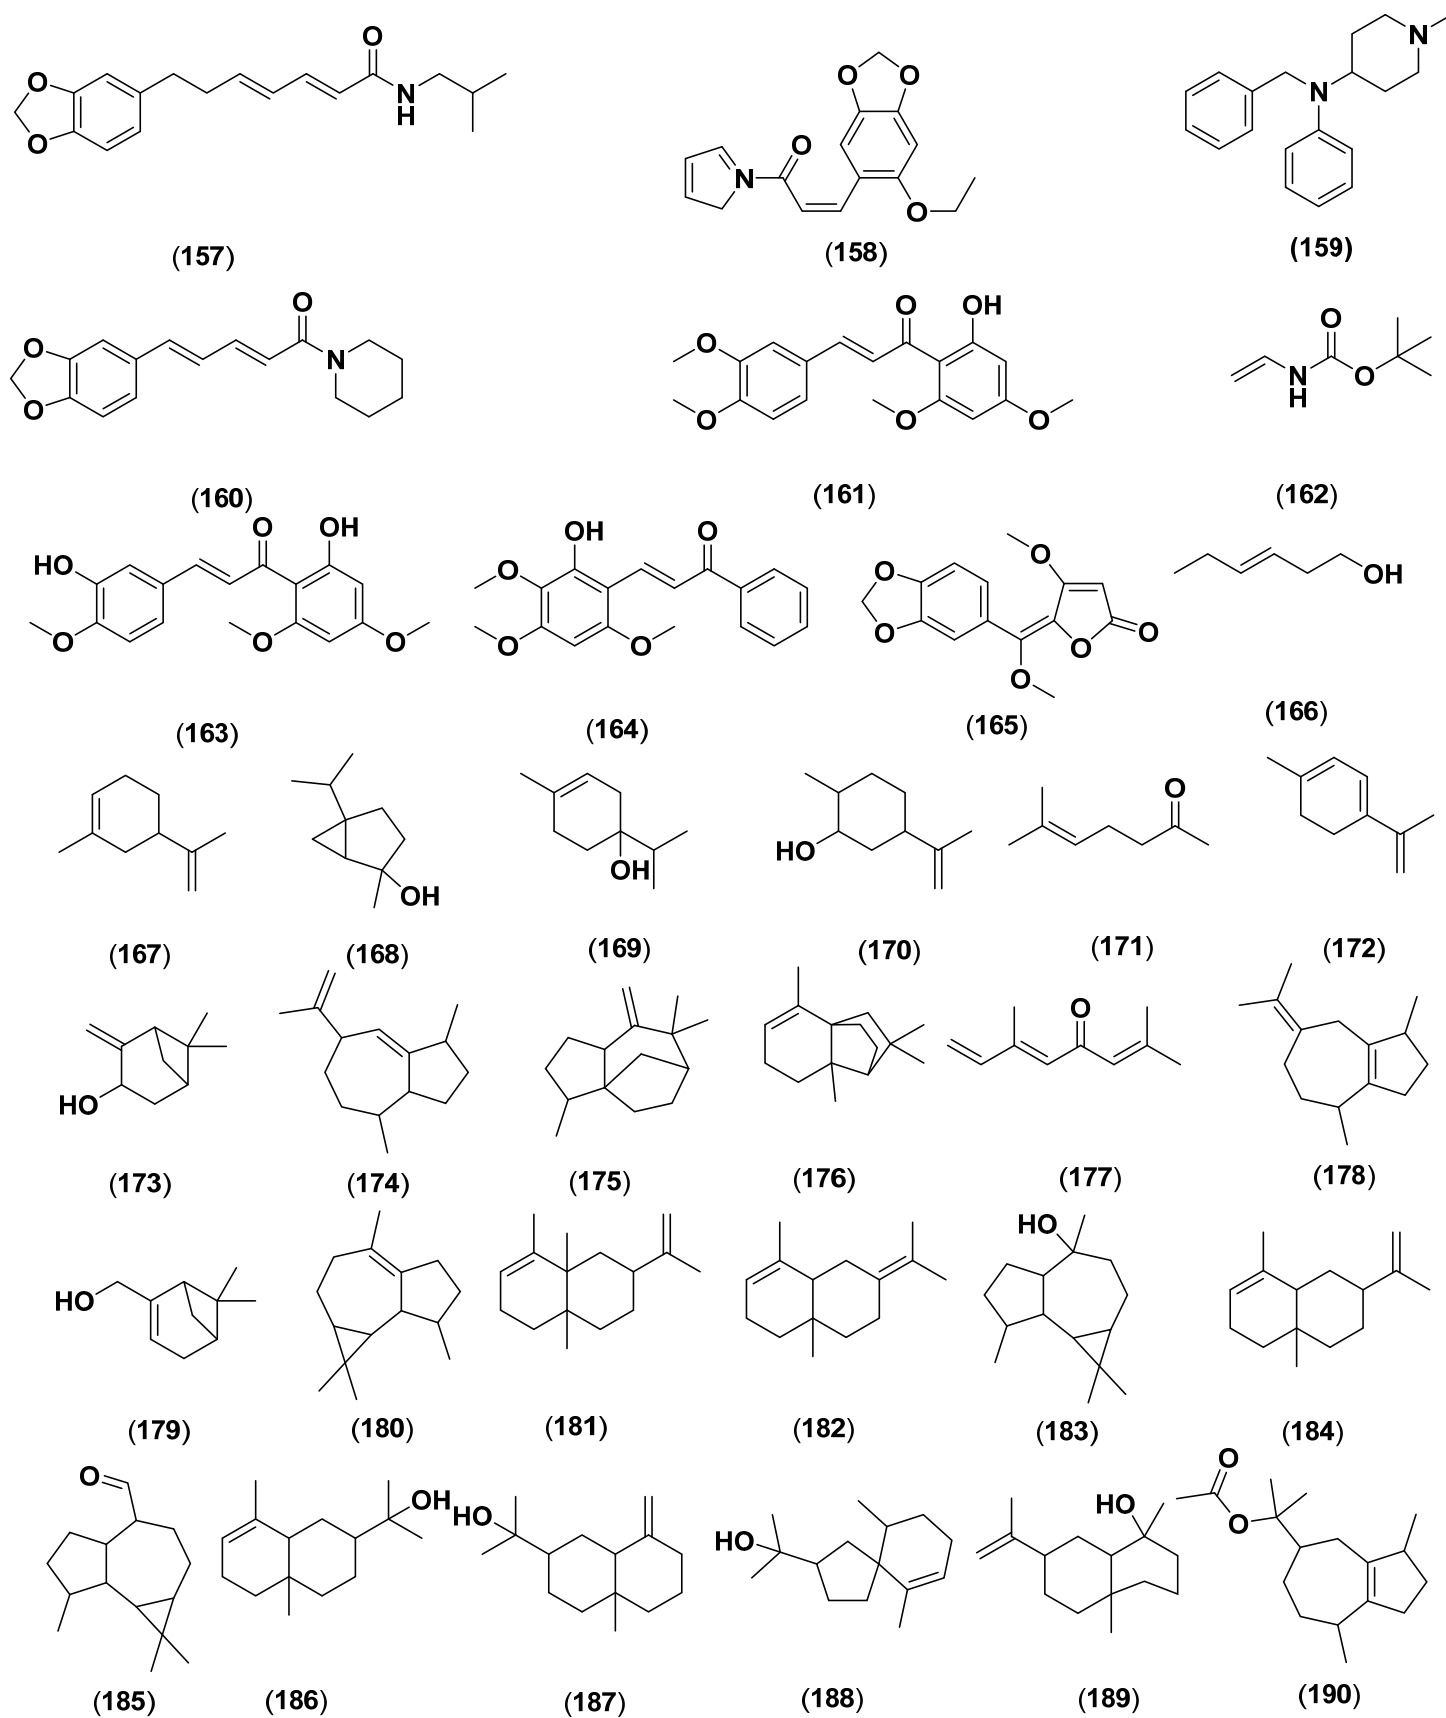Figure S8. The structure chemical compound of *P. hispidum*



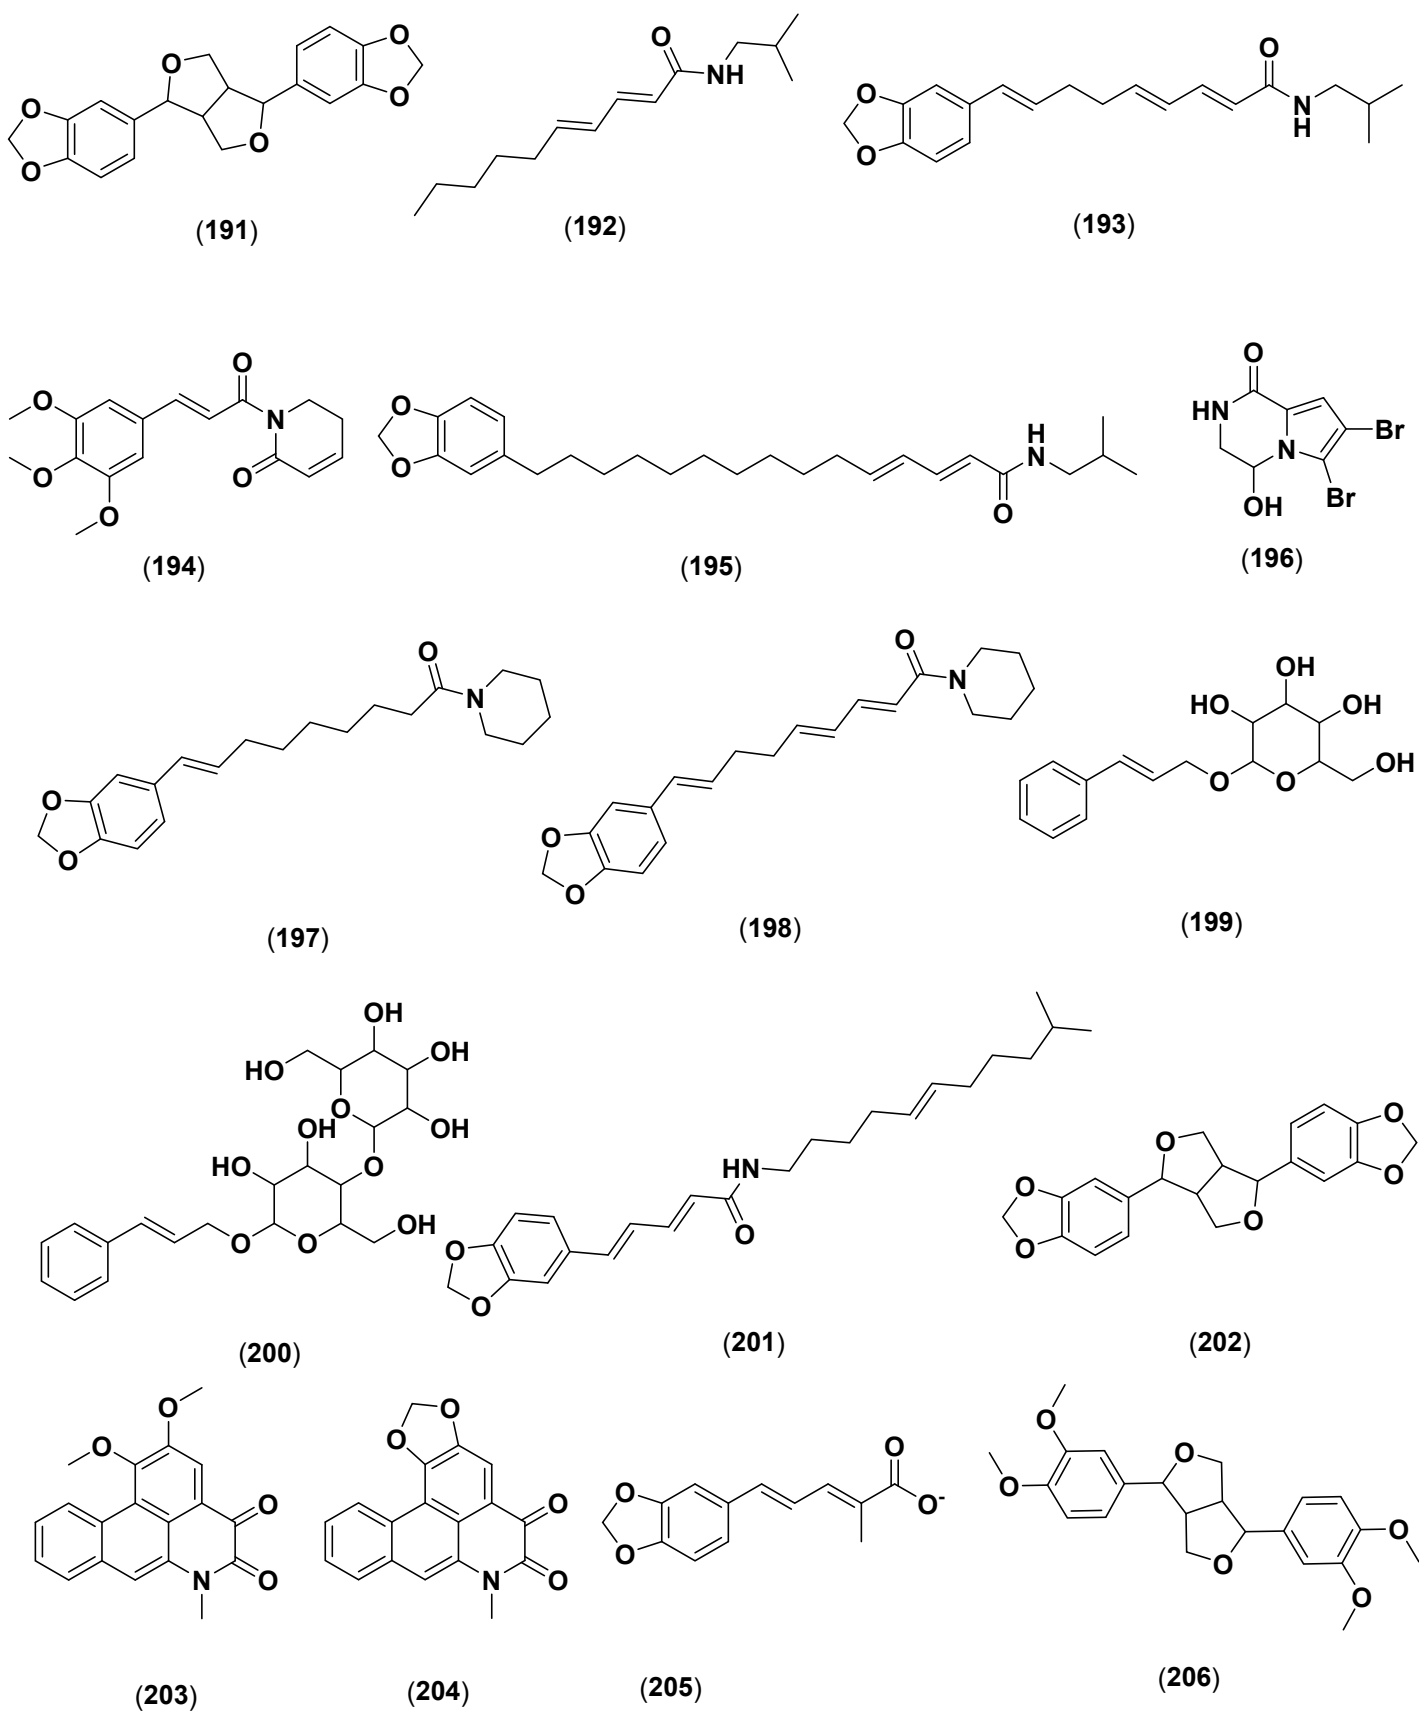

Figure S9. Cont.



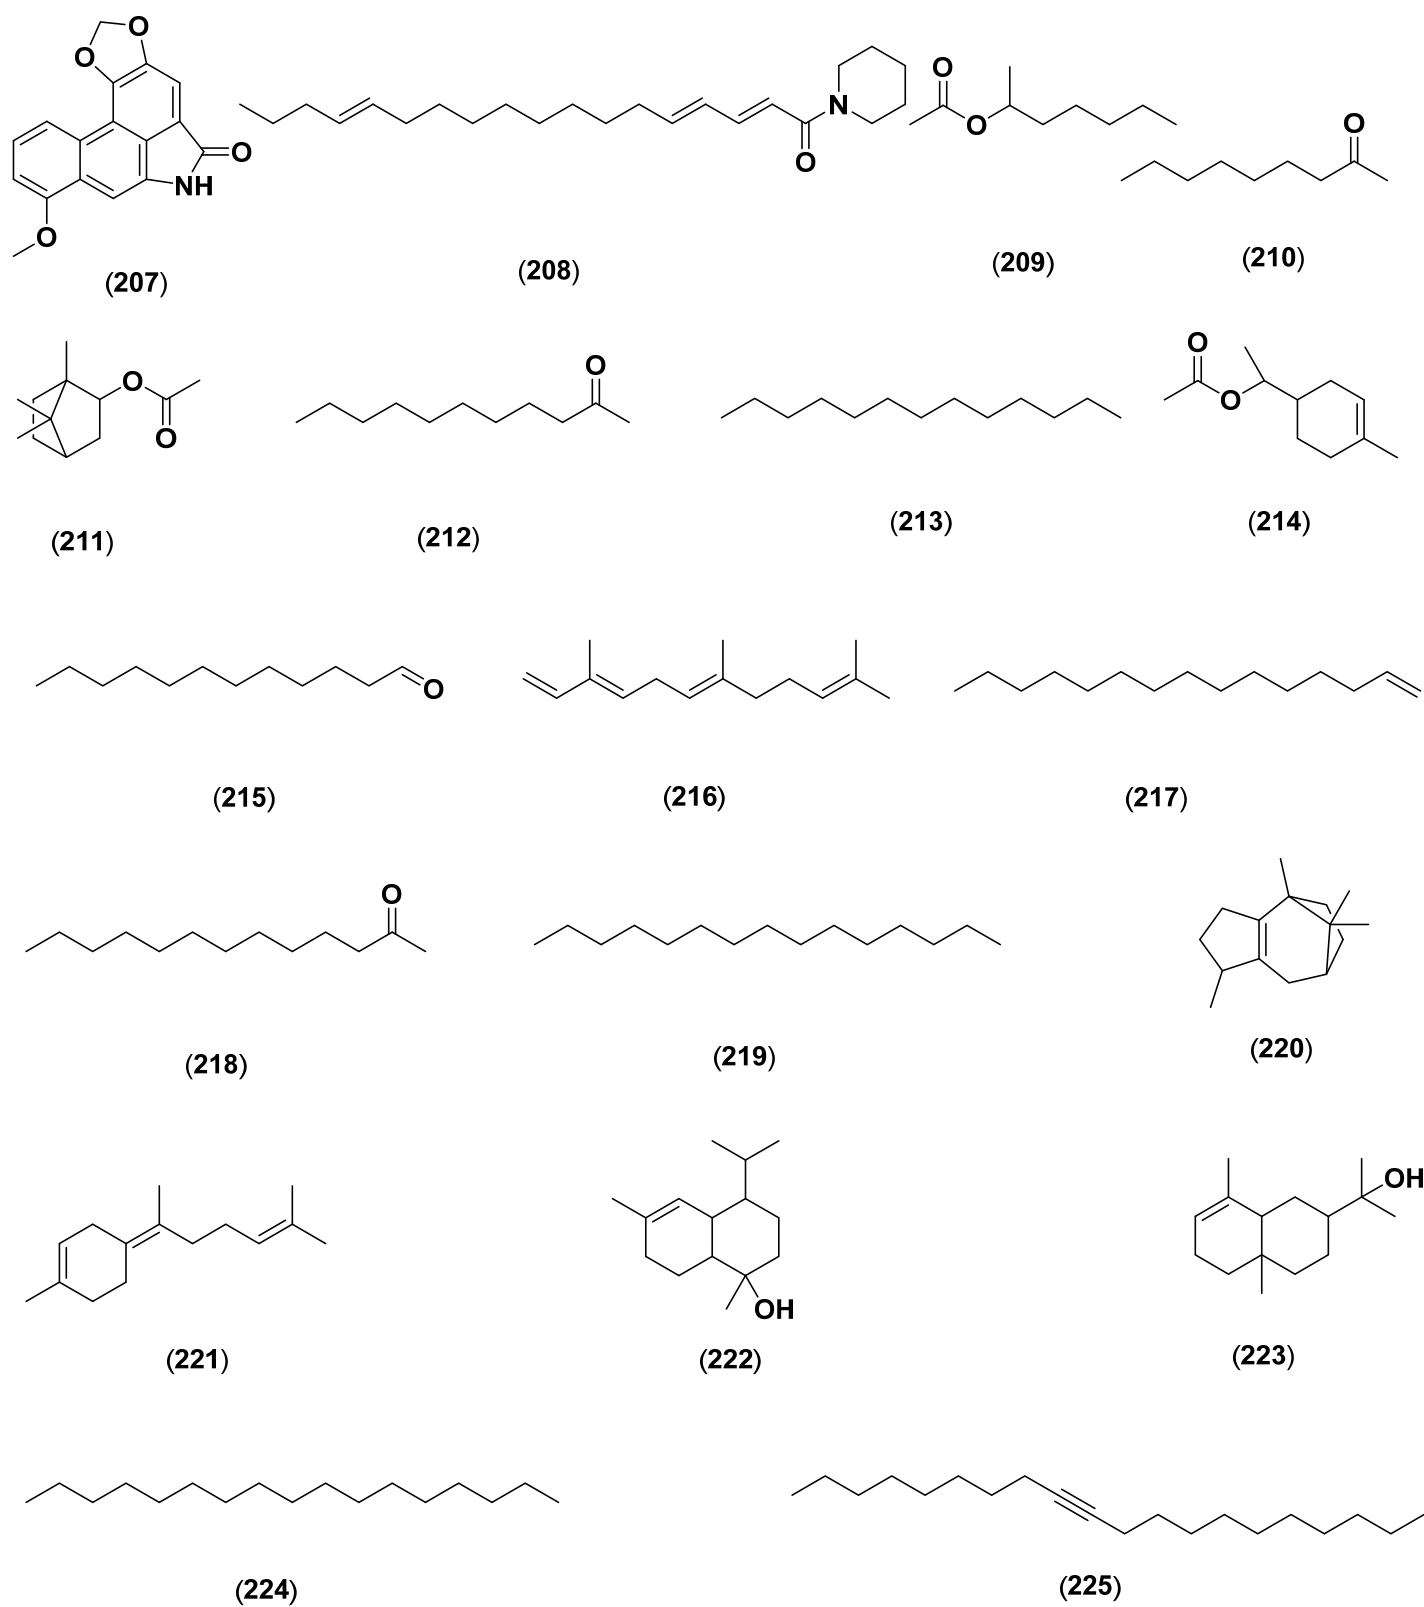Figure S9. The structure chemical compound of *P. longum*



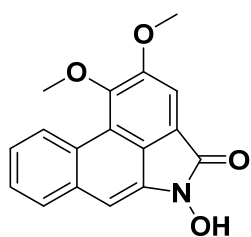

(226)

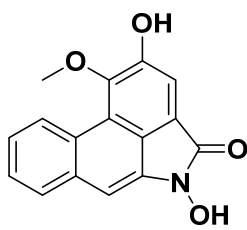

(227)

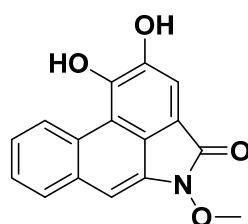

(228)

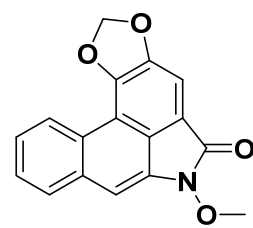

(229)

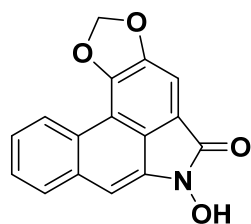

(230)

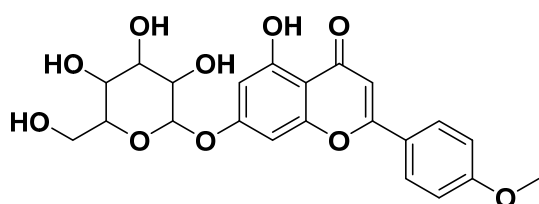

(231)

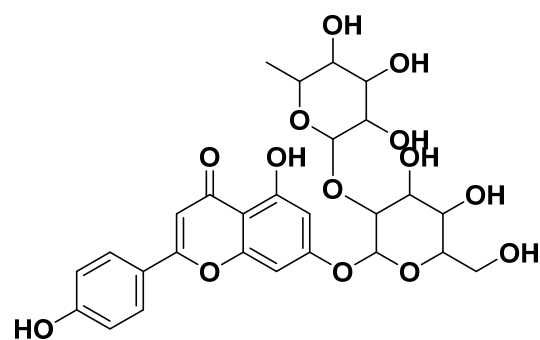

(232)

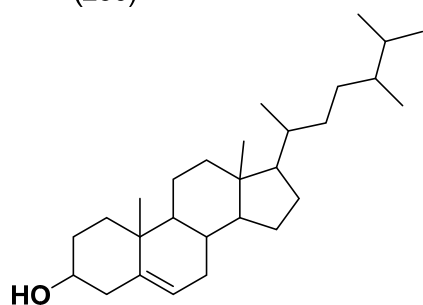

(233)

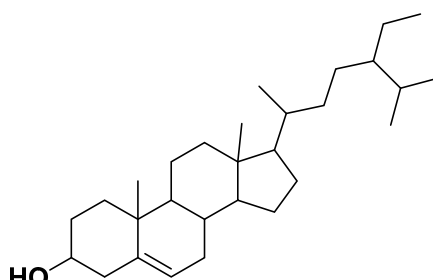

(234)

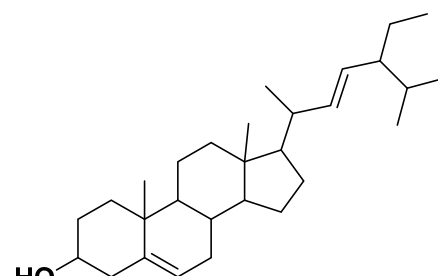

(235)

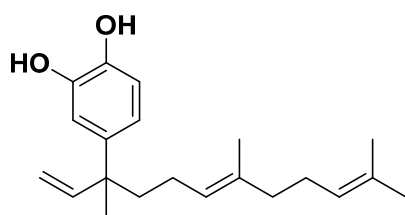

(236)

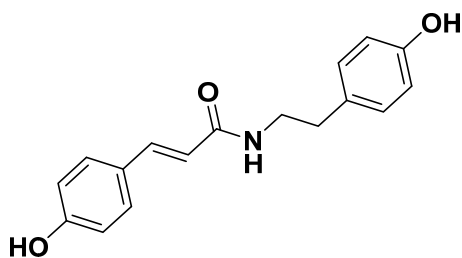

(237)

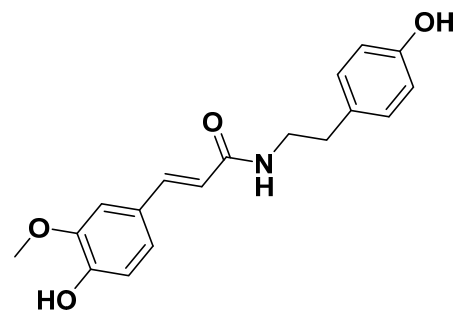

(238)

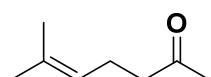

(239)

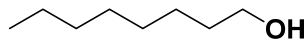

(240)

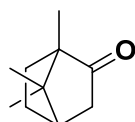

(241)

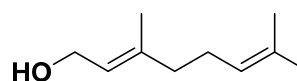

(242)

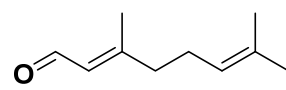

(243)

Figure S10. Cont.



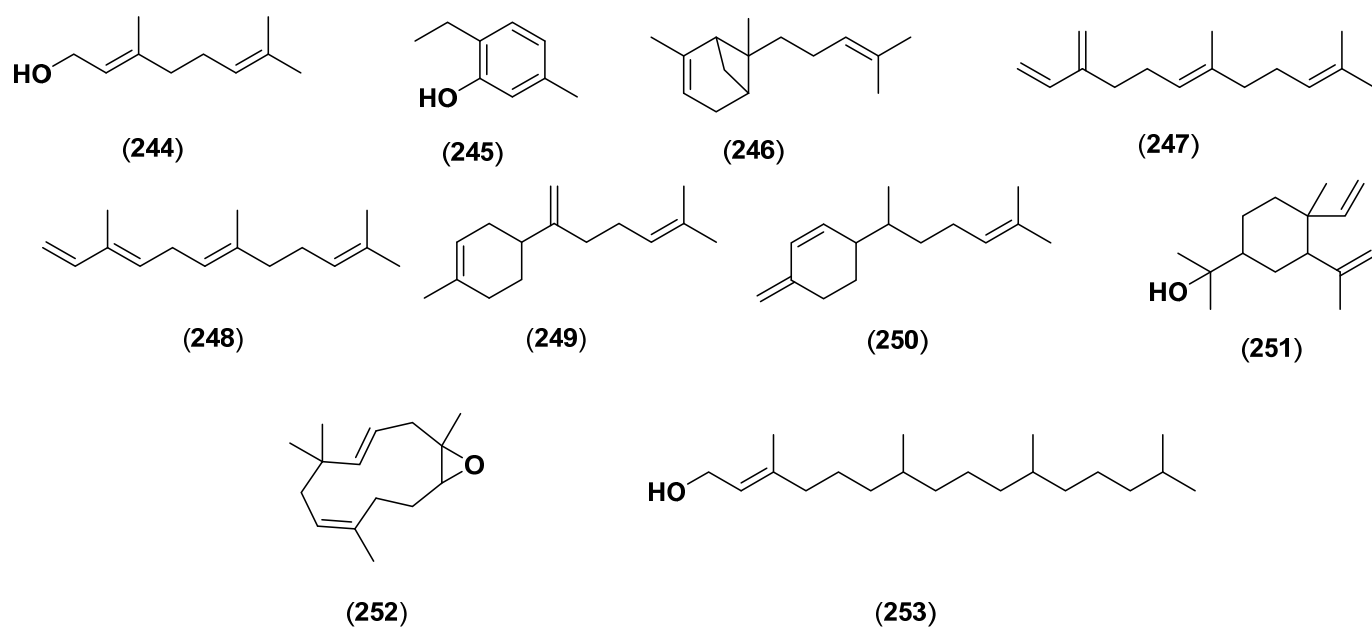

Figure S10. The structure chemical compound of *P. umbellatum*

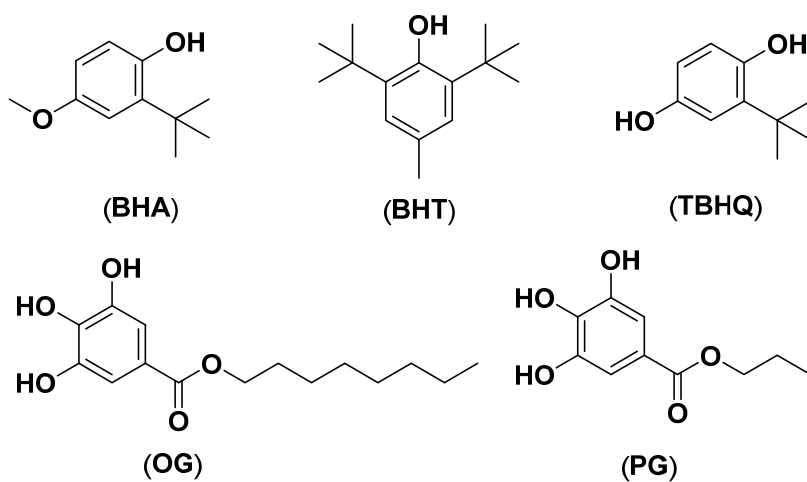

Figure S11. The chemical structure of synthetic antioxidants
